# Supplementary material for: Emotional and behavioral outcomes among youths with mental disorders during the first Covid lockdown and school closures in England: a large clinical population study using health care record integrated surveys
Source: Springer Nature journal article supplement (doi:10.1007/s00127-023-02517-w), 2023-06-23
Supplement: MOESM1 [file 25528994]

## APPENDIX

**Emotional and behavioral outcomes among youths with mental disorders during the first Covid lockdown and school closures in England: a large clinical population study using health care record integrated surveys.**  
*European Child and Adolescent Psychiatry.*

Parlatini V.<sup>1</sup>, Frangou L.<sup>1\*</sup>, Zhang S.<sup>1\*</sup>, Epstein S.<sup>1</sup>, Morris A.<sup>1</sup>, Grant C.<sup>1,2</sup>, Zalewski L.<sup>3,4</sup>, Jewell A.<sup>4</sup>,  
Velupillai S.<sup>3</sup>, Simonoff E.<sup>1,4</sup><sup>¶</sup>, Downs J.<sup>1,4</sup><sup>¶</sup>

\*<sup>¶</sup> These authors equally contributed to the study

<sup>1</sup> Department of Child and Adolescent Psychiatry, Institute of Psychiatry, Psychology and Neuroscience, Kings College London, London, UK

<sup>2</sup> Department of Epidemiology & Public Health, University College London, London, UK

<sup>3</sup> Department of Biostatistics & Health Informatics, Institute of Psychiatry, Psychology and Neuroscience, King's College London, London, UK

<sup>4</sup> National Institute for Health Research (NIHR) Biomedical Research Centre, South London and Maudsley NHS Foundation Trust, London, UK

Corresponding author: [valeria.parlatini@kcl.ac.uk](mailto:valeria.parlatini@kcl.ac.uk)

## **CYPHER survey – 1<sup>st</sup> wave**

The following tables report the Maudsley Child and Young People Health & Experience Research (CYPHER) survey questions for parents and young people; proportion of responses provided; and correlations between average matched parent and young people responses. Please note, in this study we did not analyze open questions, thus we did not include these in the tables.

**Questions included in composite scores are color-coded as follows:**

### **Outcomes**

Total emotional score: yellow

Total behavioural score: light blue

Emotional and behavioural changes: orange

### **Other composite scores**

Covid-related worries: light green

Parent mental health: pink

Lack of family support: water green

Parent concerns: red

Housing inadequacy: purple

Challenges with education: green

Experience of child's mental health care: fuchsia

Quality of child's relationships: blue

| Question        | COVID-19 EXPOSURE AND PHYSICAL HEALTH                                                                                    | PARENT<br>N=1741                                                                                                          | YOUNG<br>PEOPLE<br>N=1708 | r<br>(p-value)* |
|-----------------|--------------------------------------------------------------------------------------------------------------------------|---------------------------------------------------------------------------------------------------------------------------|---------------------------|-----------------|
| Q2              | <b>Have you been suspected of having Coronavirus/COVID-19 infection?</b>                                                 |                                                                                                                           |                           |                 |
|                 | No, not suspected                                                                                                        | 1605 (92.1%)                                                                                                              |                           |                 |
|                 | Yes, medical diagnosis, but no test                                                                                      | 13 (0.7%)                                                                                                                 |                           |                 |
|                 | Yes, waiting for test result                                                                                             | 3 (0.1%)                                                                                                                  |                           |                 |
|                 | Yes, a positive test result                                                                                              | 9 (0.5%)                                                                                                                  |                           |                 |
|                 | Yes, a negative test result                                                                                              | 30 (1.7%)                                                                                                                 |                           |                 |
|                 | I'd rather not say                                                                                                       | 7 (0.4%)                                                                                                                  |                           |                 |
|                 | Missing                                                                                                                  | 74 (4.2%)                                                                                                                 |                           |                 |
| Q3              | <b>Have any of the following happened to you because of Coronavirus/COVID-19? (check all that apply)</b>                 |                                                                                                                           |                           |                 |
|                 | Fallen ill physically                                                                                                    | 7 (0.4%)                                                                                                                  |                           |                 |
|                 | Hospitalized                                                                                                             | 1 (0.06%)                                                                                                                 |                           |                 |
|                 | Self- isolation with symptoms                                                                                            | 4 (0.2%)                                                                                                                  |                           |                 |
|                 | Self- isolation without symptoms (e.g., due to possible exposure)                                                        | 10 (0.5%)                                                                                                                 |                           |                 |
|                 | None of the above                                                                                                        | 3 (0.1%)                                                                                                                  |                           |                 |
|                 | Missing                                                                                                                  | 1716 (98.5%)                                                                                                              |                           |                 |
| Q4              | <b>Has anyone in your family been diagnosed with Coronavirus/COVID-19? (check all that apply)</b>                        |                                                                                                                           |                           |                 |
|                 | Yes, member of household                                                                                                 | 23 (1.3%)                                                                                                                 |                           |                 |
|                 | Yes, non-household member                                                                                                | 78 (4.4%)                                                                                                                 |                           |                 |
|                 | No                                                                                                                       | 1567 (90%)                                                                                                                |                           |                 |
|                 | Missing                                                                                                                  | 77 (4.4%)                                                                                                                 |                           |                 |
| Q5              | <b>Have any of the following happened to your family members because of Coronavirus/COVID-19? (check all that apply)</b> |                                                                                                                           |                           |                 |
|                 | Fallen ill physically                                                                                                    | 36 (2%)                                                                                                                   |                           |                 |
|                 | Hospitalized                                                                                                             | 31 (1.7%)                                                                                                                 |                           |                 |
|                 | Self- isolation with symptoms                                                                                            | 42 (2.4%)                                                                                                                 |                           |                 |
|                 | Self- isolation without symptoms (e.g., due to possible exposure)                                                        | 21 (1.2%)                                                                                                                 |                           |                 |
|                 | Passed away                                                                                                              | 28 (1.6%)                                                                                                                 |                           |                 |
|                 | NA/Missing                                                                                                               | 1647 (94.6%)                                                                                                              |                           |                 |
| Q6              | <b>Has your child been suspected of having Coronavirus/COVID-19 infection?</b>                                           |                                                                                                                           |                           |                 |
|                 | No, not suspected                                                                                                        | 1621 (93.11%)                                                                                                             |                           |                 |
|                 | Yes, medical diagnosis, but no test                                                                                      | 10 (0.5%)                                                                                                                 |                           |                 |
|                 | Yes, waiting for test result                                                                                             | 3 (0.1%)                                                                                                                  |                           |                 |
|                 | Yes, a positive test result                                                                                              | 2 (0.1%)                                                                                                                  |                           |                 |
|                 | Yes, a negative test result                                                                                              | 13 (0.7%)                                                                                                                 |                           |                 |
|                 | Yes, I do not want to share their test result                                                                            | 2 (0.1%)                                                                                                                  |                           |                 |
|                 | Missing                                                                                                                  | 90 (5.1%)                                                                                                                 |                           |                 |
| Q7              | <b>Have any of the following happened to your child because of Coronavirus/COVID-19? (check all that apply)</b>          |                                                                                                                           |                           |                 |
|                 | Fallen ill physically                                                                                                    | 3 (0.1%)                                                                                                                  |                           |                 |
|                 | Hospitalized                                                                                                             | 1 (0.05%)                                                                                                                 |                           |                 |
|                 | Put into self-isolation with symptoms                                                                                    | 7 (0.4%)                                                                                                                  |                           |                 |
|                 | Put into self-isolation without symptoms (e.g., due to possible exposure)                                                | 3 (0.1%)                                                                                                                  |                           |                 |
|                 | NA/Missing                                                                                                               | 1730 (99.3%)                                                                                                              |                           |                 |
|                 | Q8 P/Q1 YP                                                                                                               | <b>Has your child reported changes in their sense of smell?<br/>have you reported any changes in your sense of smell?</b> |                           |                 |
| No              |                                                                                                                          | 1626 (93.3%)                                                                                                              | 1212 (70.96%)             |                 |
| Yes, possibly   |                                                                                                                          | 15 (0.8%)                                                                                                                 | 46 (2.6%)                 |                 |
| Yes, definitely |                                                                                                                          | 10 (0.5%)                                                                                                                 | 28 (1.6%)                 |                 |
| Missing         |                                                                                                                          | 90 (5.1%)                                                                                                                 | 422 (24.7%)               |                 |

| Question     | CHILD'S SYMPTOMS<br>(PAST TWO WEEKS)                                                                                                              | PARENT<br>N=1741 | YOUNG<br>PERSON<br>N=1708 | r<br>(p-value)* |
|--------------|---------------------------------------------------------------------------------------------------------------------------------------------------|------------------|---------------------------|-----------------|
| Q9 P/Q2 YP   | <b>how worried was your child generally?</b><br><b>how worried were you generally?</b>                                                            |                  |                           | 0.472 (<0.001)  |
|              | Not worried at all                                                                                                                                | 357 (20.5%)      | 257 (15%)                 |                 |
|              | Slightly worried                                                                                                                                  | 411 (23.6%)      | 365 (21.3%)               |                 |
|              | Moderately worried                                                                                                                                | 399 (22.9%)      | 344 (20.1%)               |                 |
|              | Very worried                                                                                                                                      | 256 (14.7%)      | 221 (12.9%)               |                 |
|              | Extremely worried                                                                                                                                 | 130 (7.4%)       | 99 (5.8%)                 |                 |
|              | Missing                                                                                                                                           | 188 (10.8%)      | 422 (24.7%)               |                 |
| Q10 P/Q3 YP  | <b>how happy versus sad was your child?</b><br><b>how happy versus sad were you?</b>                                                              |                  |                           | 0.430 (<0.001)  |
|              | Very sad/depressed/unhappy                                                                                                                        | 144 (8.2%)       | 147 (8.6%)                |                 |
|              | Moderately sad/depressed/unhappy                                                                                                                  | 484 (27.8%)      | 388 (22.7%)               |                 |
|              | Neutral                                                                                                                                           | 526 (30.2%)      | 493 (28.72%)              |                 |
|              | Moderately happy/cheerful                                                                                                                         | 291 (16.7%)      | 190 (11.1%)               |                 |
|              | Very happy/cheerful                                                                                                                               | 100 (5.7%)       | 68 (3.9%)                 |                 |
|              | Missing                                                                                                                                           | 196 (11.2%)      | 422 (24.7%)               |                 |
| Q11 P/Q4 YP  | <b>how much has your child been able to enjoy his/her usual activities?</b><br><b>how much have you been able to enjoy your usual activities?</b> |                  |                           | 0.386 (<0.001)  |
|              | Not at all                                                                                                                                        | 295 (16.9%)      | 245 (14.3%)               |                 |
|              | Slightly                                                                                                                                          | 522 (29.9%)      | 442 (25.8%)               |                 |
|              | Moderately                                                                                                                                        | 508 (29.1%)      | 385 (22.5%)               |                 |
|              | Very much                                                                                                                                         | 181 (10.4%)      | 142 (8.3%)                |                 |
|              | A lot                                                                                                                                             | 45 (2.5%)        | 73 (4.2%)                 |                 |
|              | Missing                                                                                                                                           | 190 (10.9%)      | 421 (24.6%)               |                 |
| Q12 P/ Q5 YP | <b>how relaxed versus anxious was your child?</b><br><b>how relaxed versus anxious were you?</b>                                                  |                  |                           | 0.401 (<0.001)  |
|              | Very relaxed/calm                                                                                                                                 | 109 (6.2%)       | 107 (6.2%)                |                 |
|              | Moderately relaxed/calm                                                                                                                           | 296 (17%)        | 215 (12.5%)               |                 |
|              | Neutral                                                                                                                                           | 342 (19.6%)      | 352(20.6%)                |                 |
|              | Moderately nervous/anxious                                                                                                                        | 556 (31.9%)      | 424 (24.8%)               |                 |
|              | Very nervous/anxious                                                                                                                              | 249 (14.3%)      | 187(10.9%)                |                 |
|              | Missing                                                                                                                                           | 189 (10.8%)      | 423 (24.7%)               |                 |
| Q13 P/ Q6 YP | <b>how well has your child been sleeping?</b><br><b>how well have you been sleeping?</b>                                                          |                  |                           | 0.347 (<0.001)  |
|              | Sleeping much more than usual                                                                                                                     | 141 (8.1%)       | 114 (6.6%)                |                 |
|              | Sleeping a little more than usual                                                                                                                 | 194 (11.1%)      | 198 (11.5%)               |                 |
|              | Sleeping about the same                                                                                                                           | 555 (31.8%)      | 397 (23.2%)               |                 |
|              | Sleeping a little less than usual                                                                                                                 | 400 (22.9%)      | 337 (19.7%)               |                 |
|              | Sleeping a lot less than usual                                                                                                                    | 263 (15.1%)      | 241 (14.1%)               |                 |
|              | Missing                                                                                                                                           | 188 (10.8%)      | 421 (24.6%)               |                 |
| Q14 P/ Q7 YP | <b>how fidgety or restless was your child?</b><br><b>how fidgety or restless were you?</b>                                                        |                  |                           | 0.495 (<0.001)  |
|              | Not restless at all                                                                                                                               | 247 (14.9%)      | 190 (11.1%)               |                 |
|              | Slightly restless                                                                                                                                 | 316 (18.1%)      | 282 (16.5%)               |                 |
|              | Moderately restless                                                                                                                               | 416 (23.8%)      | 353 (20.6%)               |                 |
|              | Very restless                                                                                                                                     | 374 (21.4%)      | 298 (17.4%)               |                 |
|              | Extremely restless                                                                                                                                | 197 (11.3%)      | 160 (9.3%)                |                 |
|              | Missing                                                                                                                                           | 191 (10.9%)      | 425 (24.8%)               |                 |
| Q15 P/ Q8 YP | <b>how fatigued or tired was your child?</b><br><b>how fatigued or tired were you?</b>                                                            |                  |                           | 0.420 (<0.001)  |
|              | Not fatigued or tired at all                                                                                                                      | 411 (23.6%)      | 260 (15.2%)               |                 |
|              | Slightly fatigued or tired                                                                                                                        | 395 (22.6%)      | 335 (19.6%)               |                 |
|              | Moderately fatigued or tired                                                                                                                      | 411 (23.6%)      | 335 (19.6%)               |                 |
|              | Very fatigued or tired                                                                                                                            | 254 (14.5%)      | 245 (14.3%)               |                 |
|              | Extremely fatigued or tired                                                                                                                       | 82 (4.7%)        | 110 (6.4%)                |                 |
|              | Missing                                                                                                                                           | 188 (10.8%)      | 423 (24.7%)               |                 |

|                  |                                                                                                                                                  |              |             |                |
|------------------|--------------------------------------------------------------------------------------------------------------------------------------------------|--------------|-------------|----------------|
| Q16 P/ Q9<br>YP  | <b>for their age, how well has your child been able to concentrate or focus? how well were you able to concentrate or focus?</b>                 |              |             | 0.420 (<0.001) |
|                  | Very focused/attentive                                                                                                                           | 81 (4.6%)    | 68 (3.9%)   |                |
|                  | Moderately focused/attentive                                                                                                                     | 268 (15.3%)  | 193 (3.9%)  |                |
|                  | Neutral                                                                                                                                          | 318 (18.2%)  | 329 (19.2%) |                |
|                  | Moderately unfocused/distracted                                                                                                                  | 485 (27.8%)  | 432 (25.2%) |                |
|                  | Very unfocused/distracted                                                                                                                        | 400 (22.9%)  | 263 (15.4%) |                |
|                  | Missing                                                                                                                                          | 189 (10.8%)  | 423 (24.7%) |                |
| Q17 P/ Q10<br>YP | <b>how irritable or easily angered has your child been? how irritable or easily angered have you been?</b>                                       |              |             | 0.525 (<0.001) |
|                  | Not irritable or easily angered at all                                                                                                           | 160 (9.1%)   | 164 (9.6%)  |                |
|                  | Slightly irritable or easily angered                                                                                                             | 353 (20.2%)  | 293 (17.1%) |                |
|                  | Moderately irritable or easily angered                                                                                                           | 356 (20.4%)  | 297 (17.3%) |                |
|                  | Very irritable or easily angered                                                                                                                 | 401 (23%)    | 357 (20.9%) |                |
|                  | Extremely irritable or easily angered                                                                                                            | 284 (16.3%)  | 176 (10.3%) |                |
|                  | Missing                                                                                                                                          | 187 (10.7%)  | 421 (24.6%) |                |
| Q18 P/ Q11<br>YP | <b>how physically aggressive towards others has your child been? how physically aggressive towards others have you been?</b>                     |              |             | 0.651 (<0.001) |
|                  | No aggression at all                                                                                                                             | 578 (33.2%)  | 470 (27.5%) |                |
|                  | A little aggression, once or twice and not severe                                                                                                | 340 (19.5%)  | 299 (17.5%) |                |
|                  | Some aggression but not severe                                                                                                                   | 331 (19%)    | 277 (16.2%) |                |
|                  | Some aggression, including hurting others                                                                                                        | 183 (10.5%)  | 129 (7.5%)  |                |
|                  | Frequent aggression, including hurting others                                                                                                    | 121 (6.9%)   | 51 (2.9%)   |                |
|                  | Missing                                                                                                                                          | 188 (10.8%)  | 482 (28.2%) |                |
| Q19 P/ Q12<br>YP | <b>how physically aggressive have others been towards your child? how physically aggressive have others been towards you?</b>                    |              |             | 0.386 (<0.001) |
|                  | No aggression at all                                                                                                                             | 1093 (62.7%) | 743 (43.5%) |                |
|                  | A little aggression, once or twice and not severe                                                                                                | 265 (15.2%)  | 285 (16.6%) |                |
|                  | Some aggression but not severe                                                                                                                   | 136 (7.8%)   | 145 (8.4%)  |                |
|                  | Some aggression, including hurting others                                                                                                        | 37 (2.1%)    | 35 (2%)     |                |
|                  | Frequent aggression, including hurting your child                                                                                                | 17 (0.9%)    | 15 (0.8%)   |                |
|                  | Missing                                                                                                                                          | 193 (11%)    | 485 (28.4%) |                |
| Q20 P/ Q13<br>YP | <b>how lonely has your child been? how lonely have you been?</b>                                                                                 |              |             | 0.485 (<0.001) |
|                  | Not lonely at all                                                                                                                                | 409 (23.4%)  | 385 (22.5%) |                |
|                  | Slightly lonely                                                                                                                                  | 427 (24.5%)  | 305 (17.8%) |                |
|                  | Moderately lonely                                                                                                                                | 364 (20.9%)  | 266 (15.5%) |                |
|                  | Very lonely                                                                                                                                      | 225 (12.9%)  | 171 (10%)   |                |
|                  | Extremely lonely                                                                                                                                 | 126 (7.24%)  | 98 (5.7%)   |                |
|                  | Missing                                                                                                                                          | 190 (10.9%)  | 483 (28.2%) |                |
| Q21 P/ Q14<br>YP | <b>how worried has your child been about being infected? how worried have you been about being infected?</b>                                     |              |             | 0.579 (<0.001) |
|                  | Not at all                                                                                                                                       | 497 (28.5%)  | 401 (23.4%) |                |
|                  | Slightly                                                                                                                                         | 430 (24.7%)  | 332 (19.4%) |                |
|                  | Moderately                                                                                                                                       | 275 (15.8%)  | 203 (11.8%) |                |
|                  | Very                                                                                                                                             | 208 (11.9%)  | 149 (8.7%)  |                |
|                  | Extremely                                                                                                                                        | 139 (7.9%)   | 139 (8.1%)  |                |
|                  | Missing                                                                                                                                          | 192(11%)     | 484 (28.3%) |                |
| Q22 P/ Q15<br>YP | <b>how worried has your child been about friends or family being infected? how worried have you been about friends or family being infected?</b> |              |             | 0.521 (<0.001) |
|                  | Not at all                                                                                                                                       | 411 (26.5%)  | 186 (10.8%) |                |
|                  | Slightly                                                                                                                                         | 464 (29.9%)  | 291 (17%)   |                |
|                  | Moderately                                                                                                                                       | 286 (18.4%)  | 263 (15.4%) |                |
|                  | Very                                                                                                                                             | 238 (15.3%)  | 255 (14.9%) |                |
|                  | Extremely                                                                                                                                        | 149 (9.6%)   | 229 (13.4%) |                |
|                  | Missing                                                                                                                                          | 193 (11%)    | 484 (28.3%) |                |

|                  |                                                                                                                                                                 |             |             |                |
|------------------|-----------------------------------------------------------------------------------------------------------------------------------------------------------------|-------------|-------------|----------------|
| Q26 P/ Q18<br>YP | <b>Overall, how would you compare your child's emotions (such as worries, sadness/happiness) to what they were like before the COVID pandemic?</b>              |             |             |                |
|                  | <b>Overall, how would you compare your emotions (such as worries, sadness/happiness) to what they were like before the COVID pandemic?</b>                      |             |             | 0.375 (<0.001) |
|                  | Much worse                                                                                                                                                      | 333 (19.1%) | 196 (11.4%) |                |
|                  | A little worse                                                                                                                                                  | 481 (27.6%) | 409 (23.9%) |                |
|                  | About the same                                                                                                                                                  | 566 (32.5%) | 411 (24%)   |                |
|                  | A little better                                                                                                                                                 | 118 (6.7%)  | 146 (8.5%)  |                |
|                  | Much better                                                                                                                                                     | 58 (3.3%)   | 64 (3.7%)   |                |
| Missing          | 185 (10.6%)                                                                                                                                                     | 482 (28.2%) |             |                |
| Q27 P/ Q19<br>YP | <b>Overall, how would you compare your child's behaviour (such as fidgetiness, concentration, aggression) to what they were like before the COVID pandemic?</b> |             |             |                |
|                  | <b>Overall, how would you compare your emotions (such as worries, sadness/happiness) to what they were like before the COVID pandemic?</b>                      |             |             | 0.448 (<0.001) |
|                  | Much worse                                                                                                                                                      | 285 (10.8%) | 224 (13.1%) |                |
|                  | A little worse                                                                                                                                                  | 517 (29.7%) | 426 (24.9%) |                |
|                  | About the same                                                                                                                                                  | 526 (30.2%) | 426 (24.9%) |                |
|                  | A little better                                                                                                                                                 | 152 (8.7%)  | 102 (5.9%)  |                |
|                  | Much better                                                                                                                                                     | 73 (4.1%)   | 47 (2.7%)   |                |
| Missing          | 188 (10.8%)                                                                                                                                                     | 483 (28.2%) |             |                |

| Question         | CHILD RELATIONSHIP CHANGES AND THEIR IMPACT<br>(PAST TWO WEEKS)                                                                                                                                                                       | PARENT<br>N=1741 | YOUNG<br>PERSON<br>N=1708 | r<br>(p-value)* |
|------------------|---------------------------------------------------------------------------------------------------------------------------------------------------------------------------------------------------------------------------------------|------------------|---------------------------|-----------------|
| Q28              | <b>how would you rate the quality of your relationship with your son/daughter?</b>                                                                                                                                                    |                  |                           |                 |
|                  | Very poor                                                                                                                                                                                                                             | 34 (1.9%)        |                           |                 |
|                  | Fairly poor                                                                                                                                                                                                                           | 67 (3.8%)        |                           |                 |
|                  | Mixed                                                                                                                                                                                                                                 | 410 (23.5%)      |                           |                 |
|                  | Fairly good                                                                                                                                                                                                                           | 463 (26.5%)      |                           |                 |
|                  | Very good                                                                                                                                                                                                                             | 563 (32.3%)      |                           |                 |
|                  | Missing                                                                                                                                                                                                                               | 204 (11.7%)      |                           |                 |
| Q29              | <b>has the quality of the relationships between your child and his/her siblings changed?</b>                                                                                                                                          |                  |                           |                 |
|                  | A lot worse                                                                                                                                                                                                                           | 109 (6.2%)       |                           |                 |
|                  | A little worse                                                                                                                                                                                                                        | 311 (17.8%)      |                           |                 |
|                  | About the same                                                                                                                                                                                                                        | 568 (32.6%)      |                           |                 |
|                  | A little better                                                                                                                                                                                                                       | 186 (10.6%)      |                           |                 |
|                  | A lot better                                                                                                                                                                                                                          | 129 (7.4%)       |                           |                 |
|                  | NA/Missing                                                                                                                                                                                                                            | 438 (25.1%)      |                           |                 |
| Q30              | <b>how stressful have changes in contacts with extended family or friends been for your child?</b>                                                                                                                                    |                  |                           |                 |
|                  | Not at all                                                                                                                                                                                                                            | 339 (19.4%)      |                           |                 |
|                  | Slightly                                                                                                                                                                                                                              | 383 (22%)        |                           |                 |
|                  | Moderately                                                                                                                                                                                                                            | 419 (24%)        |                           |                 |
|                  | Very                                                                                                                                                                                                                                  | 251 (14.4%)      |                           |                 |
|                  | Extremely                                                                                                                                                                                                                             | 143 (8.2%)       |                           |                 |
|                  | Missing                                                                                                                                                                                                                               | 206 (11.83%)     |                           |                 |
| Q31 P/ Q21<br>YP | <b>have these emotions and behaviours affected your child's relationship with you and your partner, for better or worse? have these emotions and behaviours affected your relationship with your parents, for better or worse?</b>    |                  |                           | 0.309 (<0.001)  |
|                  | Much better                                                                                                                                                                                                                           | 79 (4.5%)        | 95 (5.5%)                 |                 |
|                  | A little better                                                                                                                                                                                                                       | 173 (9.9%)       | 158 (9.2%)                |                 |
|                  | About the same                                                                                                                                                                                                                        | 799 (45.8%)      | 612 (35.8%)               |                 |
|                  | A little worse                                                                                                                                                                                                                        | 356 (20.4%)      | 268 (15.6%)               |                 |
|                  | Much worse                                                                                                                                                                                                                            | 97 (5.5%)        | 74 (4.3%)                 |                 |
|                  | Missing                                                                                                                                                                                                                               | 237 (13.6%)      | 501 (29.3%)               |                 |
| Q32 P/ Q22<br>YP | <b>have these emotions and behaviours affected your child's relationship with their siblings, for better or worse? have these emotions and behaviours affected your relationship with your brothers/sisters, for better or worse?</b> |                  |                           | 0.434 (<0.001)  |
|                  | Much better                                                                                                                                                                                                                           | 60 (3.4%)        | 67 (3.9%)                 |                 |
|                  | A little better                                                                                                                                                                                                                       | 150 (8.6%)       | 110 (6.4%)                |                 |
|                  | About the same                                                                                                                                                                                                                        | 601 (34.5%)      | 491 (28.7%)               |                 |
|                  | A little worse                                                                                                                                                                                                                        | 321 (18.4%)      | 270 (15.8%)               |                 |
|                  | Much worse                                                                                                                                                                                                                            | 129 (7.4%)       | 107 (6.2%)                |                 |
|                  | NA/Missing                                                                                                                                                                                                                            | 480 (27.5%)      | 663 (38.8%)               |                 |
| Q33 P/ Q23<br>YP | <b>have these emotions and behaviours affected your child's relationship with their friends, for better or worse? have these emotions and behaviours affected your relationship with friends, for better or worse?</b>                |                  |                           | 0.397 (<0.001)  |
|                  | Much better                                                                                                                                                                                                                           | 40 (2.3%)        | 72 (4.2%)                 |                 |
|                  | A little better                                                                                                                                                                                                                       | 73 (4.1%)        | 90 (5.2%)                 |                 |
|                  | About the same                                                                                                                                                                                                                        | 1009 (57.9%)     | 712 (41.6%)               |                 |
|                  | A little worse                                                                                                                                                                                                                        | 269 (15.4%)      | 241 (14.1%)               |                 |
|                  | Much worse                                                                                                                                                                                                                            | 100 (5.7%)       | 84 (4.9%)                 |                 |
|                  | Missing                                                                                                                                                                                                                               | 250 (14.3%)      | 509 (29.8%)               |                 |

| Question         | EXPERIENCE OF MENTAL HEALTH CARE FOR YOUR CHILD                                                                                                                                | PARENT<br>N=1741 | YOUNG<br>PERSON<br>N=1708 | r<br>(p-value)* |
|------------------|--------------------------------------------------------------------------------------------------------------------------------------------------------------------------------|------------------|---------------------------|-----------------|
| Q34 P/ Q24<br>YP | <b>How has the <u>quality</u> of mental health care changed over this time?how has the <u>quality</u> of mental health care that you are receiving changed over this time?</b> |                  |                           | 0.463 (<0.001)  |
|                  | A lot worse                                                                                                                                                                    | 193 (11%)        | 142 (8.3%)                |                 |
|                  | A little worse                                                                                                                                                                 | 340 (19.5%)      | 198 (11.5%)               |                 |
|                  | About the same                                                                                                                                                                 | 789 (45.3%)      | 668 (39.1%)               |                 |
|                  | A little better                                                                                                                                                                | 103 (5.9%)       | 102 (5.9%)                |                 |
|                  | A lot better                                                                                                                                                                   | 49 (2.8%)        | 48 (2.8%)                 |                 |
|                  | Missing                                                                                                                                                                        | 267 (15.3%)      | 550 (32.2%)               |                 |
| Q35 P/ Q25<br>YP | <b>How has the <u>quantity</u> of mental health care changed over this time? how has the quantity of your mental health care changed over this time?</b>                       |                  |                           | 0.330 (<0.001)  |
|                  | A lot less                                                                                                                                                                     | 234 (13.4%)      | 173 (10.1%)               |                 |
|                  | A little less                                                                                                                                                                  | 236 (13.5%)      | 170 (9.9%)                |                 |
|                  | About the same                                                                                                                                                                 | 794 (45.6%)      | 642 (37.5%)               |                 |
|                  | A little more                                                                                                                                                                  | 132 (7.5%)       | 128 (7.4%)                |                 |
|                  | A lot more                                                                                                                                                                     | 72 (7.5%)        | 44 (2.5%)                 |                 |
|                  | Missing                                                                                                                                                                        | 273 (15.6%)      | 551 (32.2%)               |                 |
| Q36 P/ Q26<br>YP | <b>How well is the mental health care you are currently receiving meeting the needs of you and your child? how well is the mental health care meeting your needs?</b>          |                  |                           | 0.644 (<0.001)  |
|                  | Not meeting our needs at all                                                                                                                                                   | 341 (19.5%)      | 204 (11.9%)               |                 |
|                  | Slightly meeting our needs                                                                                                                                                     | 255 (14.6%)      | 210 (12.3%)               |                 |
|                  | Moderately meeting our needs                                                                                                                                                   | 282 (16.2%)      | 249 (14.5%)               |                 |
|                  | Meeting our needs well                                                                                                                                                         | 266 (15.2%)      | 206 (12%)                 |                 |
|                  | Meeting our needs very well                                                                                                                                                    | 94 (5.4%)        | 83 (4.8%)                 |                 |
|                  | NA/Missing                                                                                                                                                                     | 503 (28.8%)      | 756 (44.2%)               |                 |

| Question         | EDUCATION AND CHILD CARE                                                                                                                        | PARENT<br>N=1741 | YOUNG<br>PERSON<br>N=1708 | r<br>(p-value)* |
|------------------|-------------------------------------------------------------------------------------------------------------------------------------------------|------------------|---------------------------|-----------------|
| Q37              | <b>What level of education is your child regularly enrolled in (before the COVID-19 pandemic)?</b>                                              |                  |                           |                 |
|                  | Not currently in education                                                                                                                      | 55 (3.1%)        |                           |                 |
|                  | Pre-school                                                                                                                                      | 4 (0.2%)         |                           |                 |
|                  | Primary School                                                                                                                                  | 561 (32.2%)      |                           |                 |
|                  | Secondary school (up to GCSEs)                                                                                                                  | 679 (39%)        |                           |                 |
|                  | Sixth form or college                                                                                                                           | 128 (7.3%)       |                           |                 |
|                  | Is home schooled                                                                                                                                | 52 (2.9%)        |                           |                 |
|                  | Missing                                                                                                                                         | 262 (15%)        |                           |                 |
| Q38              | <b>How have your child's education arrangements changed (past 2 weeks)?</b>                                                                     |                  |                           |                 |
|                  | No change from before COVID-19                                                                                                                  | 328 (18.4%)      |                           |                 |
|                  | Attends physical school at least some days                                                                                                      | 254 (14.5%)      |                           |                 |
|                  | Only attending school remotely, on part-time basis                                                                                              | 446 (25.6%)      |                           |                 |
|                  | Only attending school remotely, on full-time basis                                                                                              | 346 (19.8%)      |                           |                 |
|                  | Missing                                                                                                                                         | 367 (21%)        |                           |                 |
| Q39              | <b>To what extent has looking after your child at home made it difficult to do your paid work and/or domestic duties?</b>                       |                  |                           |                 |
|                  | Almost never                                                                                                                                    | 307 (17.6%)      |                           |                 |
|                  | Rarely                                                                                                                                          | 175 (10%)        |                           |                 |
|                  | Sometimes                                                                                                                                       | 382 (21.9%)      |                           |                 |
|                  | Often                                                                                                                                           | 316 (18.1%)      |                           |                 |
|                  | Almost always                                                                                                                                   | 284 (16.3%)      |                           |                 |
|                  | Missing                                                                                                                                         | 277 (15.9%)      |                           |                 |
| Q40 P/ Q27<br>YP | <b>How much is your child currently enjoying his/her education? how much are you currently enjoying your education?</b>                         |                  |                           | 0.597 (<0.001)  |
|                  | Almost never                                                                                                                                    | 363 (20.8%)      | 362 (21.1%)               |                 |
|                  | Rarely                                                                                                                                          | 340 (19.5%)      | 232 (13.5%)               |                 |
|                  | Sometimes                                                                                                                                       | 458 (26.3%)      | 344 (20.1%)               |                 |
|                  | Often                                                                                                                                           | 194 (11.1%)      | 133 (7.7%)                |                 |
|                  | Almost always                                                                                                                                   | 108 (6.2%)       | 102 (5.9%)                |                 |
|                  | Missing                                                                                                                                         | 278 (15.9%)      | 535 (31.3%)               |                 |
| Q41 P/ Q28<br>YP | <b>How much is your child currently engaging in his/her distance education? how much are you currently engaging in your distance education?</b> |                  |                           | 0.679 (<0.001)  |
|                  | Almost never                                                                                                                                    | 350 (20.1%)      | 263 (15.4%)               |                 |
|                  | Rarely                                                                                                                                          | 259 (14.8%)      | 179 (10.4%)               |                 |
|                  | Sometimes                                                                                                                                       | 373 (21.4%)      | 291 (17%)                 |                 |
|                  | Often                                                                                                                                           | 258 (14.8%)      | 228 (13.3%)               |                 |
|                  | Almost always                                                                                                                                   | 216 (12.4%)      | 199 (11.6%)               |                 |
|                  | Missing                                                                                                                                         | 285 (16.3%)      | 548 (32%)                 |                 |

| Question | WORK-FAMILY BALANCE AND HOME ENVIRONEMNT<br>(PAST TWO WEEKS)                                                                                                            | PARENT<br>N=1741 | YOUNG<br>PERSON<br>N=1708 | r<br>(p-value)* |
|----------|-------------------------------------------------------------------------------------------------------------------------------------------------------------------------|------------------|---------------------------|-----------------|
| Q42      | <b>to what extent have you felt focused and productive in your work and/or domestic duties?</b>                                                                         |                  |                           |                 |
|          | Almost never                                                                                                                                                            | 137 (7.8%)       |                           |                 |
|          | Rarely                                                                                                                                                                  | 263 (15.1%)      |                           |                 |
|          | Sometimes                                                                                                                                                               | 579 (33.2%)      |                           |                 |
|          | Often                                                                                                                                                                   | 311 (17.8%)      |                           |                 |
|          | Almost always                                                                                                                                                           | 156 (8.9%)       |                           |                 |
|          | Missing                                                                                                                                                                 | 295 (16.9%)      |                           |                 |
| Q43      | <b>to what extent has your family found ways of dealing with things that have been difficult?</b>                                                                       |                  |                           |                 |
|          | Almost never                                                                                                                                                            | 44 (2.5%)        |                           |                 |
|          | Rarely                                                                                                                                                                  | 109 (6.2%)       |                           |                 |
|          | Sometimes                                                                                                                                                               | 607 (34.8%)      |                           |                 |
|          | Often                                                                                                                                                                   | 485 (27.8%)      |                           |                 |
|          | Almost always                                                                                                                                                           | 196 (11.2%)      |                           |                 |
|          | Missing                                                                                                                                                                 | 300 (17.2%)      |                           |                 |
| Q44      | <b>to what extent have people in your family actively supported <u>each other</u> when upset about any aspect of the crisis?</b>                                        |                  |                           |                 |
|          | Almost never                                                                                                                                                            | 51 (2.9%)        |                           |                 |
|          | Rarely                                                                                                                                                                  | 87 (5%)          |                           |                 |
|          | Sometimes                                                                                                                                                               | 359 (20.6%)      |                           |                 |
|          | Often                                                                                                                                                                   | 509 (29.2%)      |                           |                 |
|          | Almost always                                                                                                                                                           | 437 (25.1%)      |                           |                 |
|          | Missing                                                                                                                                                                 | 298 (17.1%)      |                           |                 |
| Q45      | <b>to what extent have people in your family provided practical, emotional and/or financial support to people <u>in other Countries</u> struggling with the crisis?</b> |                  |                           |                 |
|          | Almost never                                                                                                                                                            | 589 (33.8%)      |                           |                 |
|          | Rarely                                                                                                                                                                  | 236 (13.5%)      |                           |                 |
|          | Sometimes                                                                                                                                                               | 338 (19.4%)      |                           |                 |
|          | Often                                                                                                                                                                   | 154 (8.8%)       |                           |                 |
|          | Almost always                                                                                                                                                           | 100 (5.7%)       |                           |                 |
|          | Missing                                                                                                                                                                 | 324 (18.6%)      |                           |                 |
| Q47      | <b>How would you describe your home accommodation?</b>                                                                                                                  |                  |                           |                 |
|          | Very comfortable, plenty of personal space for everyone                                                                                                                 | 736 (42.2%)      |                           |                 |
|          | Fairly comfortable, but with some sharing and occasionally difficult to have personal space                                                                             | 386 (22.1%)      |                           |                 |
|          | Somewhat problematic with a lot of sharing but usually able to find some personal space when needed                                                                     | 171 (9.8%)       |                           |                 |
|          | Very problematic, with no personal space                                                                                                                                | 149 (8.5%)       |                           |                 |
|          | Missing                                                                                                                                                                 | 299 (17.1%)      |                           |                 |
| Q48      | <b>Do you have access to a personal garden/outside space that your family can use at any time?</b>                                                                      |                  |                           |                 |
|          | Yes                                                                                                                                                                     | 1127 (64.7%)     |                           |                 |
|          | No                                                                                                                                                                      | 314 (18%)        |                           |                 |
|          | Missing                                                                                                                                                                 | 300 (17.2%)      |                           |                 |

| Question | CAREGIVER'S EMOTIONS/WORRIES<br>(PAST TWO WEEKS)                   | PARENT<br>N=1741 | YOUNG<br>PERSON<br>N=1708 | r<br>(p-value)* |
|----------|--------------------------------------------------------------------|------------------|---------------------------|-----------------|
| Q49      | <b>How worried have you been generally?</b>                        |                  |                           |                 |
|          | Not worried at all                                                 | 99 (5.6%)        |                           |                 |
|          | Slightly worried                                                   | 420 (24.1%)      |                           |                 |
|          | Moderately worried                                                 | 462 (26.5%)      |                           |                 |
|          | Very worried                                                       | 294 (16.8%)      |                           |                 |
|          | Extremely worried                                                  | 142 (8.1%)       |                           |                 |
|          | Missing                                                            | 324 (18.6%)      |                           |                 |
| Q50      | <b>How happy versus sad have you been?</b>                         |                  |                           |                 |
|          | Very sad/depressed/unhappy                                         | 101 (5.8%)       |                           |                 |
|          | Moderately sad/depressed/unhappy                                   | 419 (24%)        |                           |                 |
|          | Neutral                                                            | 521 (29.9%)      |                           |                 |
|          | Moderately happy/cheerful                                          | 325 (18.6%)      |                           |                 |
|          | Very happy/cheerful                                                | 51 (2.9%)        |                           |                 |
|          | Missing                                                            | 324 (18.6%)      |                           |                 |
| Q51      | <b>How much have you been able to enjoy your usual activities?</b> |                  |                           |                 |
|          | Not at all                                                         | 345 (19.8%)      |                           |                 |
|          | Slightly                                                           | 535 (30.7%)      |                           |                 |
|          | Moderately                                                         | 422 (24.2%)      |                           |                 |
|          | Very much                                                          | 89 (5.1%)        |                           |                 |
|          | A lot                                                              | 24 (1.3%)        |                           |                 |
|          | Missing                                                            | 326 (18.7%)      |                           |                 |
| Q52      | <b>How relaxed versus anxious have you been?</b>                   |                  |                           |                 |
|          | Very relaxed/calm                                                  | 61 (3.5)         |                           |                 |
|          | Moderately relaxed/calm                                            | 294 (16.8)       |                           |                 |
|          | Neutral                                                            | 417 (23.9%)      |                           |                 |
|          | Moderately nervous/anxious                                         | 515 (29.5%)      |                           |                 |
|          | Very nervous/anxious                                               | 128 (7.3%)       |                           |                 |
|          | Missing                                                            | 326 (18.7%)      |                           |                 |
| Q53      | <b>How fidgety or restless have you been?</b>                      |                  |                           |                 |
|          | Not restless at all                                                | 344 (19.7%)      |                           |                 |
|          | Slightly restless                                                  | 459 (26.3%)      |                           |                 |
|          | Moderately restless                                                | 398 (22.8%)      |                           |                 |
|          | Very restless                                                      | 165 (9.4%)       |                           |                 |
|          | Extremely restless                                                 | 47 (2.7%)        |                           |                 |
|          | Missing                                                            | 328 (18.8%)      |                           |                 |
| Q54      | <b>How fatigued or tired have you been?</b>                        |                  |                           |                 |
|          | Not fatigued or tired at all                                       | 141 (8.1%)       |                           |                 |
|          | Slightly fatigued or tired                                         | 391 (22.4%)      |                           |                 |
|          | Moderately fatigued or tired                                       | 343 (19.7%)      |                           |                 |
|          | Very fatigued or tired                                             | 342 (11.3%)      |                           |                 |
|          | Extremely fatigued or tired                                        | 198 (11.3%)      |                           |                 |
|          | Missing                                                            | 326 (18.7%)      |                           |                 |

|     |                                                                                       |             |  |  |
|-----|---------------------------------------------------------------------------------------|-------------|--|--|
| Q55 | <b>how well have you been able to concentrate or focus?</b>                           |             |  |  |
|     | Very focused/attentive                                                                | 163 (9.3%)  |  |  |
|     | Moderately focused/attentive                                                          | 439 (9.3%)  |  |  |
|     | Neutral                                                                               | 375 (25.2%) |  |  |
|     | Moderately unfocused/distracted                                                       | 350 (20.1%) |  |  |
|     | Very unfocused/distracted                                                             | 88 (5%)     |  |  |
|     | Missing                                                                               | 326 (18.7%) |  |  |
| Q56 | <b>How irritable or easily angered have you been?</b>                                 |             |  |  |
|     | Not irritable or easily angered at all                                                | 336 (19.3%) |  |  |
|     | Slightly irritable or easily angered                                                  | 545 (31.3%) |  |  |
|     | Moderately irritable or easily angered                                                | 333 (19.1%) |  |  |
|     | Very irritable or easily angered                                                      | 146 (8.3%)  |  |  |
|     | Extremely irritable or easily angered                                                 | 53 (3%)     |  |  |
|     | Missing                                                                               | 328 (18.8%) |  |  |
| Q57 | <b>How lonely have you been?</b>                                                      |             |  |  |
|     | Not lonely at all                                                                     | 547 (31.4%) |  |  |
|     | Slightly lonely                                                                       | 393 (22.5%) |  |  |
|     | Moderately lonely                                                                     | 253 (14.5%) |  |  |
|     | Very lonely                                                                           | 146 (8.3%)  |  |  |
|     | Extremely lonely                                                                      | 76 (4.3%)   |  |  |
|     | Missing                                                                               | 326 (18.7%) |  |  |
| Q58 | <b>How worried were you that you or someone in your family would become infected?</b> |             |  |  |
|     | Not at all                                                                            | 161 (9.2%)  |  |  |
|     | Slightly                                                                              | 447 (25.6%) |  |  |
|     | Moderately                                                                            | 331 (19%)   |  |  |
|     | Very                                                                                  | 297 (17%)   |  |  |
|     | Extremely                                                                             | 179 (10.2%) |  |  |
|     | Missing                                                                               | 326 (18.7%) |  |  |

| Question | CAREGIVER'S RELATIONSHIPS<br>(PAST TWO WEEKS)                                                                    | PARENT<br>N=1741 | YOUNG<br>PERSON<br>N=1708 | r<br>(p-value)* |
|----------|------------------------------------------------------------------------------------------------------------------|------------------|---------------------------|-----------------|
| Q61      | <b>how would you rate the quality of your relationship with your partner?</b>                                    |                  |                           |                 |
|          | Very poor                                                                                                        | 31 (1.7%)        |                           |                 |
|          | Not so good                                                                                                      | 56 (3.2%)        |                           |                 |
|          | Mixed                                                                                                            | 189 (10.8%)      |                           |                 |
|          | Quite good                                                                                                       | 242 (13.9%)      |                           |                 |
|          | Very good                                                                                                        | 381 (21.88%)     |                           |                 |
|          | NA/Missing                                                                                                       | 842 (48.3%)      |                           |                 |
| Q62      | <b>how has the quality of your relationship with your partner since COVID 19?</b>                                |                  |                           |                 |
|          | Much better                                                                                                      | 89 (5.1%)        |                           |                 |
|          | A little better                                                                                                  | 126 (7.2%)       |                           |                 |
|          | About the same                                                                                                   | 542 (31.1%)      |                           |                 |
|          | A little worse                                                                                                   | 120 (6.8%)       |                           |                 |
|          | Much worse                                                                                                       | 19 (1%)          |                           |                 |
|          | Missing                                                                                                          | 845 (48.5%)      |                           |                 |
| Q63      | <b>how would you rate the quality of the support you are receiving from your extended family and/or friends?</b> |                  |                           |                 |
|          | Very unhelpful                                                                                                   | 102 (5.8%)       |                           |                 |
|          | Unhelpful                                                                                                        | 112 (6.4%)       |                           |                 |
|          | Mixed                                                                                                            | 502 (28.8%)      |                           |                 |
|          | Helpful                                                                                                          | 474 (27.2%)      |                           |                 |
|          | Very helpful                                                                                                     | 207 (11.8%)      |                           |                 |
|          | Missing                                                                                                          | 344 (19.7%)      |                           |                 |

| Question         | COVID-19 RELATED CHANGES AND RESTRICTIONS<br>(PAST TWO WEEKS)                                                                                                                                                                                                                                                                                                 | PARENT<br>N=1741 | YOUNG<br>PERSON<br>N=1708 | r<br>(p-value)* |
|------------------|---------------------------------------------------------------------------------------------------------------------------------------------------------------------------------------------------------------------------------------------------------------------------------------------------------------------------------------------------------------|------------------|---------------------------|-----------------|
| Q59              | <b>How much has the COVID-19 outbreak, and the resulting changes to daily life, led to positive changes in your family and community?</b>                                                                                                                                                                                                                     |                  |                           |                 |
|                  | Not much                                                                                                                                                                                                                                                                                                                                                      | 363 (20.8%)      |                           |                 |
|                  | Slightly                                                                                                                                                                                                                                                                                                                                                      | 326 (18.7%)      |                           |                 |
|                  | Moderately                                                                                                                                                                                                                                                                                                                                                    | 364 (20.9%)      |                           |                 |
|                  | Quite a bit                                                                                                                                                                                                                                                                                                                                                   | 275 (15.8%)      |                           |                 |
|                  | Very much                                                                                                                                                                                                                                                                                                                                                     | 86 (4.9%)        |                           |                 |
|                  | Missing                                                                                                                                                                                                                                                                                                                                                       | 327 (18.7%)      |                           |                 |
| Q60              | <b>Why? (check all that apply)</b>                                                                                                                                                                                                                                                                                                                            |                  |                           |                 |
|                  | More quality time with family                                                                                                                                                                                                                                                                                                                                 | 544 (31.2%)      |                           |                 |
|                  | Less running around                                                                                                                                                                                                                                                                                                                                           | 407 (23.2%)      |                           |                 |
|                  | People looking out for each other                                                                                                                                                                                                                                                                                                                             | 335 (19.2%)      |                           |                 |
|                  | Greater community outreach                                                                                                                                                                                                                                                                                                                                    | 186 (10.6%)      |                           |                 |
|                  | Environment less polluted                                                                                                                                                                                                                                                                                                                                     | 310 (17.8%)      |                           |                 |
|                  | Other                                                                                                                                                                                                                                                                                                                                                         | 75 (4.3%)        |                           |                 |
|                  | Missing                                                                                                                                                                                                                                                                                                                                                       | 1018 (58.4%)     |                           |                 |
| Q64 P/ Q29<br>YP | <b>How easy is it for you and your child to comply with the 'social distancing' restrictions put in place in your community?<br/>how easy is it for you to comply with the 'social distancing' restrictions put in place in your community?</b>                                                                                                               |                  |                           | 0.423 (<0.001)  |
|                  | Very easy                                                                                                                                                                                                                                                                                                                                                     | 406 (23.3%)      | 333 (19.5%)               |                 |
|                  | Fairly easy                                                                                                                                                                                                                                                                                                                                                   | 623 (35.7%)      | 432 (25.2%)               |                 |
|                  | Somewhat difficult                                                                                                                                                                                                                                                                                                                                            | 282 (16.2%)      | 286 (16.7%)               |                 |
|                  | Very difficult                                                                                                                                                                                                                                                                                                                                                | 94 (5.4%)        | 127 (7.4%)                |                 |
|                  | Missing                                                                                                                                                                                                                                                                                                                                                       | 336 (19.3%)      | 530 (31%)                 |                 |
| Q65              | <b>How often are you getting outside your house for approved activities such as exercising, shopping for food, attending a medical appointment, work or school where necessary?</b>                                                                                                                                                                           |                  |                           |                 |
|                  | Not at all                                                                                                                                                                                                                                                                                                                                                    | 63 (3.6%)        |                           |                 |
|                  | Once a week                                                                                                                                                                                                                                                                                                                                                   | 282 (16.2%)      |                           |                 |
|                  | Several times a week                                                                                                                                                                                                                                                                                                                                          | 526 (30.2%)      |                           |                 |
|                  | Once a day                                                                                                                                                                                                                                                                                                                                                    | 365 (20.9%)      |                           |                 |
|                  | Several times a day                                                                                                                                                                                                                                                                                                                                           | 171 (9.8%)       |                           |                 |
|                  | Missing                                                                                                                                                                                                                                                                                                                                                       | 334 (19.1%)      |                           |                 |
| Q46 P/ Q30<br>YP | <b>How often is your child getting outside your house for approved activities such as exercising, shopping for food, attending a medical appointment, work or school where necessary? how often are you getting outside your house for activities such as exercising, shopping for food, attending a medical appointment, work or school where necessary?</b> |                  |                           | 0.655 (<0.001)  |
|                  | Less than once a week                                                                                                                                                                                                                                                                                                                                         | 491 (28.2%)      | 517 (30.2%)               |                 |
|                  | Several times a week                                                                                                                                                                                                                                                                                                                                          | 512 (29.4%)      | 370 (21.6%)               |                 |
|                  | Once a day                                                                                                                                                                                                                                                                                                                                                    | 330 (18.9%)      | 210 (12.3%)               |                 |
|                  | Several times a day                                                                                                                                                                                                                                                                                                                                           | 105 (6%)         | 81 (4.7%)                 |                 |
|                  | Missing                                                                                                                                                                                                                                                                                                                                                       | 303 (17.4%)      | 530 (31%)                 |                 |

| Question | EMPLOYMENT, FINANCES AND HOUSING<br>(PAST TWO WEEKS)                                                         | PARENT<br>N=1741 | YOUNG<br>PERSON<br>N=1708 | r<br>(p-value)* |
|----------|--------------------------------------------------------------------------------------------------------------|------------------|---------------------------|-----------------|
| Q66      | <b>Which one of the following best describes your current employment situation?</b>                          |                  |                           |                 |
|          | Furloughed due to COVID-19                                                                                   | 148 (8.5%)       |                           |                 |
|          | Dismissed due to COVID-19                                                                                    | 28 (1.6%)        |                           |                 |
|          | Working more hours than usual                                                                                | 108 (6.2%)       |                           |                 |
|          | Working fewer hours than usual                                                                               | 126 (7.2%)       |                           |                 |
|          | Working usual hours (full-time or part-time) at normal place of work                                         | 181 (10.4%)      |                           |                 |
|          | Working usual hours (full-time or part-time) from home                                                       | 190 (10.9%)      |                           |                 |
|          | Was not working outside the home                                                                             | 310 (17.8%)      |                           |                 |
|          | Other                                                                                                        | 306 (17.5%)      |                           |                 |
|          | Missing                                                                                                      | 344 (19.7%)      |                           |                 |
| Q67      | <b>Which one of the following best describes the current employment situation of your partner? B missing</b> |                  |                           |                 |
|          | Furloughed due to COVID-19                                                                                   | 7 (0.4%)         |                           |                 |
|          | Dismissed due to COVID-19                                                                                    | 0 (0%)           |                           |                 |
|          | Working more hours than usual                                                                                | 4 (0.2%)         |                           |                 |
|          | Working fewer hours than usual                                                                               | 13 (0.7%)        |                           |                 |
|          | Working usual hours (full-time or part-time) at normal place of work                                         | 27 (1.5%)        |                           |                 |
|          | Working usual hours (full-time or part-time) from home                                                       | 69 (3.9%)        |                           |                 |
|          | Receiving Job Keeper allowance                                                                               | 2 (0.1%)         |                           |                 |
|          | Was not working outside the home                                                                             | 7 (0.4%)         |                           |                 |
|          | Other                                                                                                        | 9 (0.5%)         |                           |                 |
|          | NA/missing                                                                                                   | 1603 (92%)       |                           |                 |
| Q68      | <b>which one of the following best describes your financial situation at this point in the crisis?</b>       |                  |                           |                 |
|          | Living comfortably                                                                                           | 238 (13.6%)      |                           |                 |
|          | Doing alright                                                                                                | 538 (30.9%)      |                           |                 |
|          | Just getting by                                                                                              | 427 (24.5%)      |                           |                 |
|          | Finding it quite difficult                                                                                   | 152 (8.7%)       |                           |                 |
|          | Finding it very difficult                                                                                    | 48 (2.7%)        |                           |                 |
|          | Missing                                                                                                      | 338 (19.4%)      |                           |                 |
| Q69      | <b>to what degree are you concerned about the stability of your housing situation?</b>                       |                  |                           |                 |
|          | Not at all                                                                                                   | 704 (40.4%)      |                           |                 |
|          | Slightly                                                                                                     | 296 (17%)        |                           |                 |
|          | Moderately                                                                                                   | 179 (10.2%)      |                           |                 |
|          | Very                                                                                                         | 111 (6.3%)       |                           |                 |
|          | Extremely                                                                                                    | 108 (6.2%)       |                           |                 |
|          | Missing                                                                                                      | 346 (19.7%)      |                           |                 |
